# Supplementary material for: Genome-wide mapping of human DNA-replication origins: Levels of transcription at ORC1 sites regulate origin selection and replication timing
Source: HighWire-hosted journal article supplement (doi:10.1101/gr.142331.112), 2012-11-27
Supplement: SuppMaterial.pdf [file SuppMaterial.pdf]

## **Supplemental Material**

Section 1: Supplemental Figures (S1-S14) and Supplemental Tables (S1-S6)

Section 2: Supplemental figure/table legends

Section 3: Supplemental Methods (Statistical analyses) and Supplemental References

**Section 1**  
**Supplemental Figures (S1-S14) and Supplemental Tables (S1-S6)**

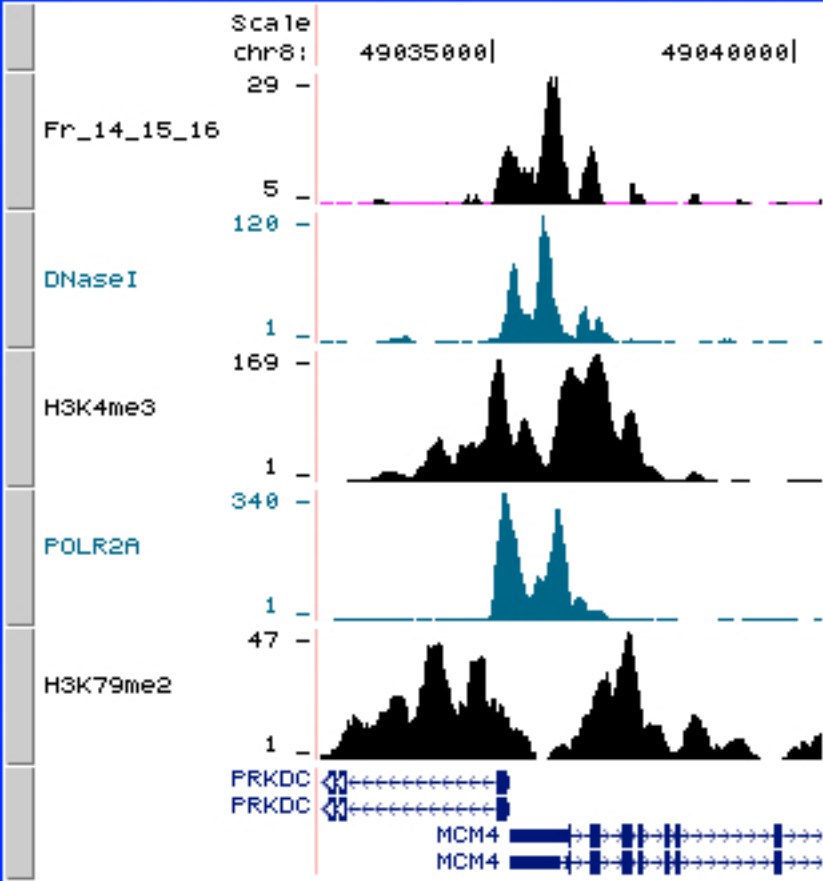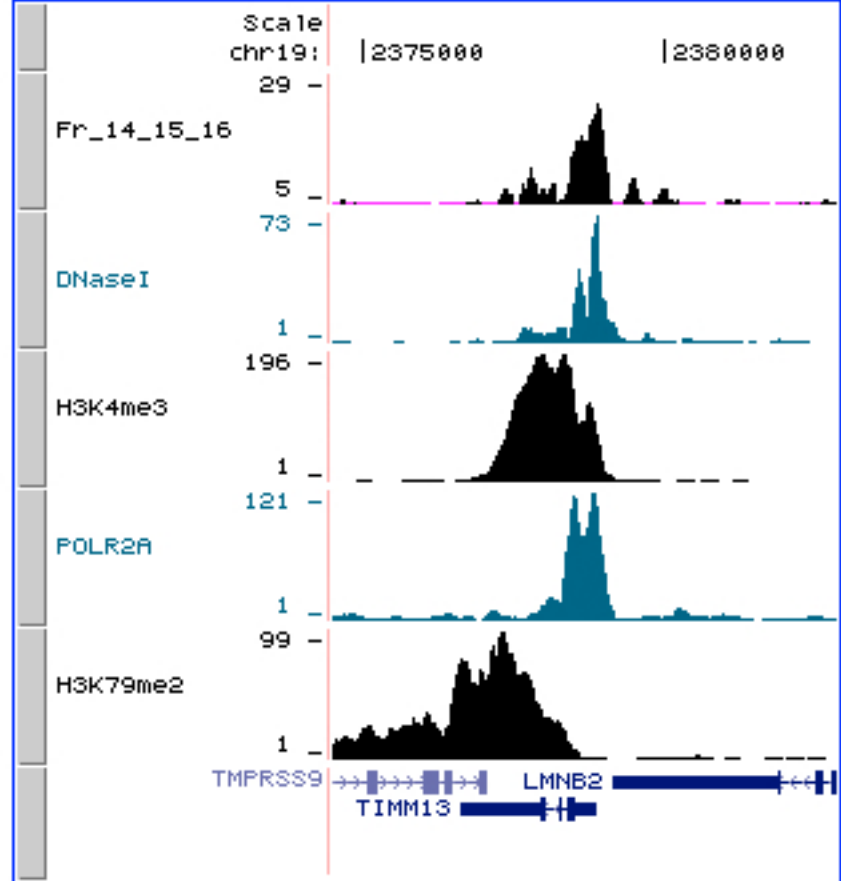

Supplemental Figure S1

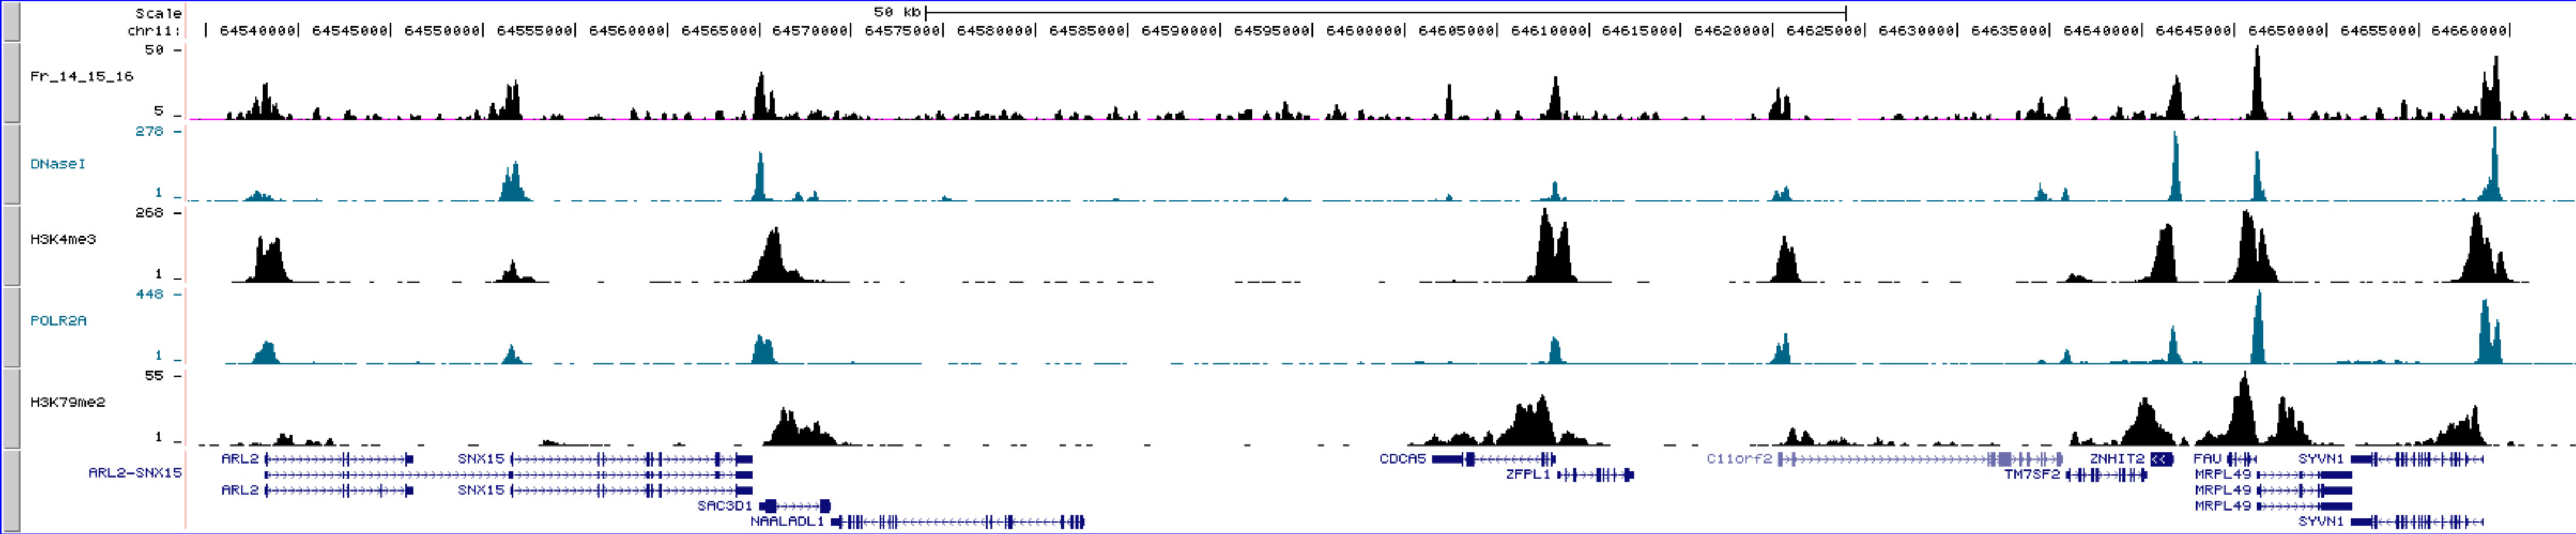

Supplemental Figure S2

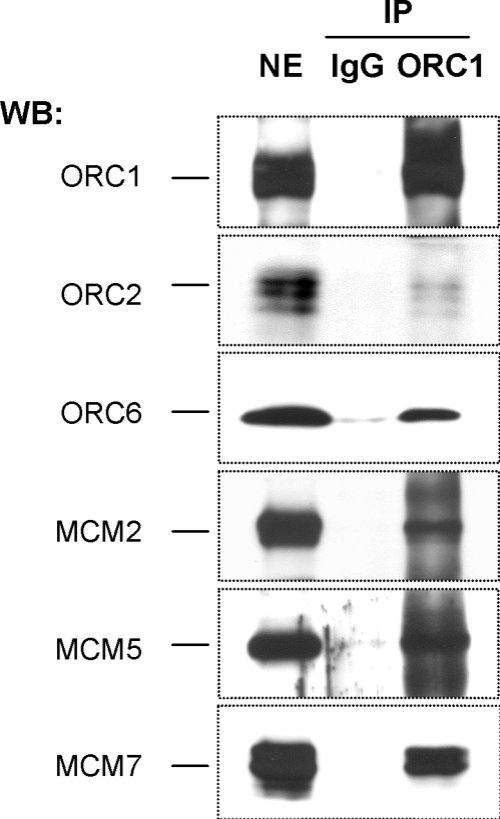

Supplemental Figure S3

**A**

Fold enrichment

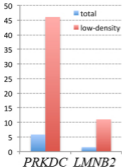**B**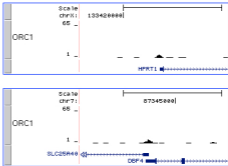

Supplemental Figure S4

**A**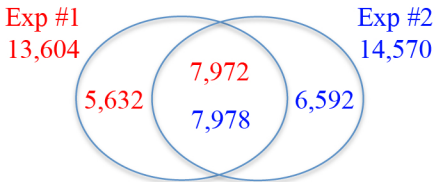**B**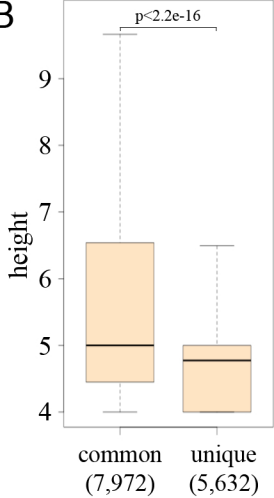

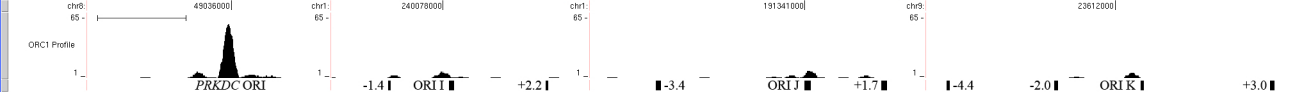

Supplemental Figure S6

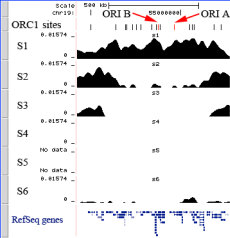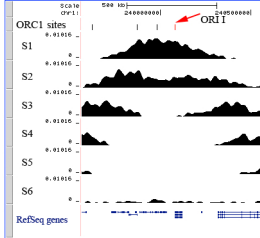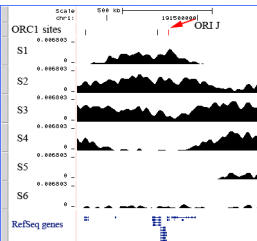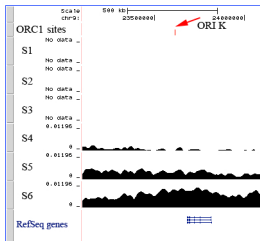

Supplemental Figure S7

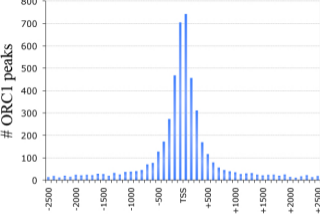

Supplemental Figure S8

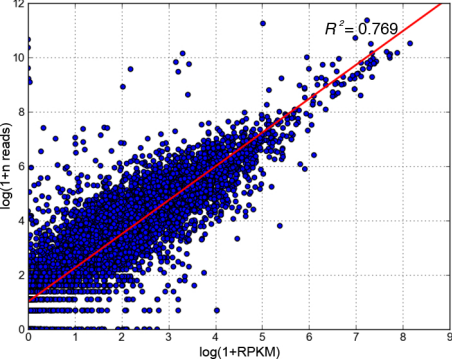

Supplemental Figure S9

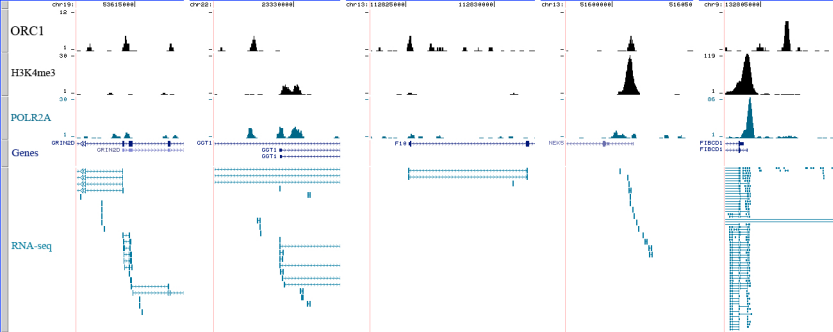

Supplemental Figure S10

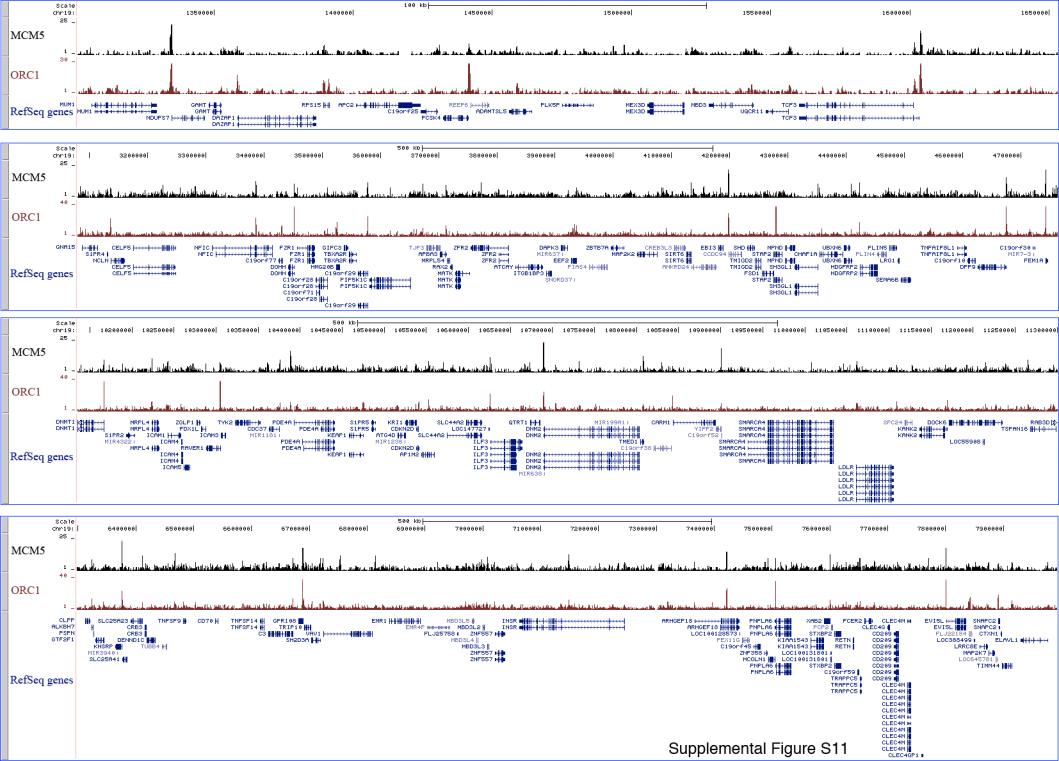

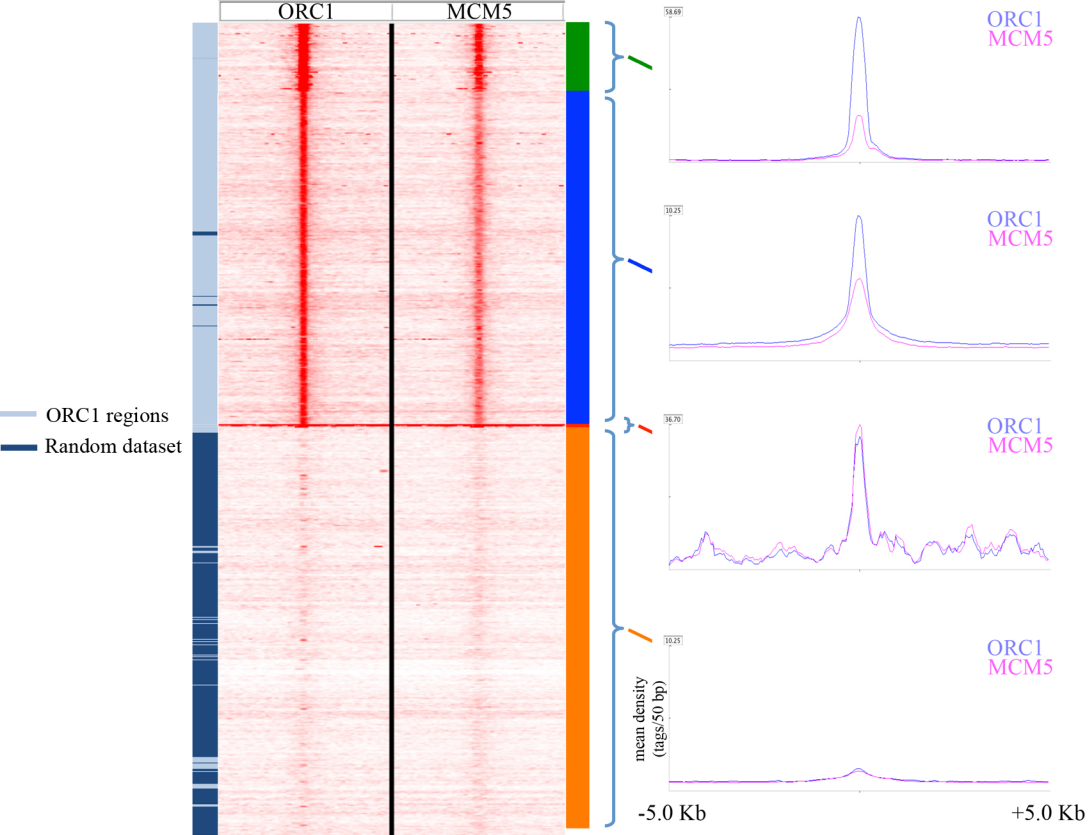

Supplemental Figure S12

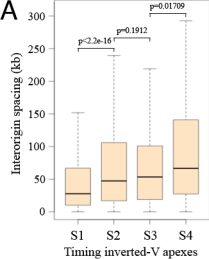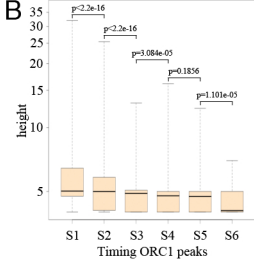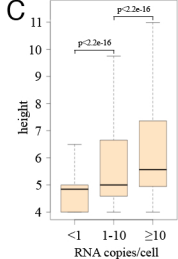

Supplemental Figure S13

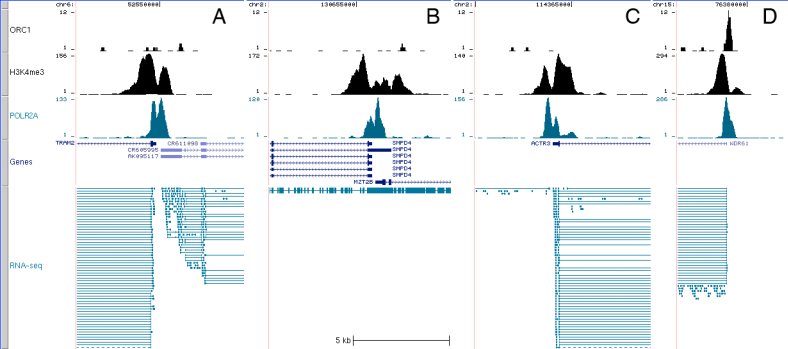

Supplemental Figure S14

| Processing steps              | HelaS3_INPUT_Exp #1 | HelaS3_INPUT_Exp #2 | HelaS3_ORC1_Exp #1 | HelaS3_ORC1_Exp #2 |
|-------------------------------|---------------------|---------------------|--------------------|--------------------|
| raw reads                     | 11,723,152          | 11,662,848          | 10,367,284         | 10,583,902         |
| aligned reads with duplicates | 9,365,313           | 9,028,301           | 7,617,047          | 7,982,089          |
| aligned reads w/o duplicates  | 8,756,061           | 8,359,592           | 2,638,288          | 2,735,996          |

Supplemental Table S1

| Timing |    | Inverted-V apexes |        |           |       | ORIs  |       |                          |       |
|--------|----|-------------------|--------|-----------|-------|-------|-------|--------------------------|-------|
|        |    | Total             | %      | with ORIs | %     | Total | %     | within inverted-V apexes | %     |
| Early  | S1 | 568               | 25.8%  | 546       | 96.1% | 4097  | 30.1% | 3541                     | 86.4% |
|        | S2 | 743               | 33.7%  | 655       | 88.2% | 4433  | 32.6% | 3245                     | 73.2% |
| Middle | S3 | 360               | 16.3%  | 269       | 74.7% | 2068  | 15.2% | 1035                     | 50.0% |
|        | S4 | 304               | 13.8%  | 164       | 53.9% | 1365  | 10.0% | 466                      | 34.1% |
| Late   | S5 | 229               | 10.4%  | 92        | 40.2% | 918   | 6.7%  | 267                      | 29.1% |
|        | S6 | -                 | -      | -         | -     | 721   | 5.3%  | -                        | -     |
| Total  |    | 2204              | 100.0% | 1726      | 78.3% | 13602 | 100%  | 8554                     | 66.4% |

Supplemental Table S2

| Genomic position   | All   |        | RNA-seq <sup>+</sup> |       |                      |       |                      |       | RNA-seq <sup>-</sup> |       |                      |       |                      |       |
|--------------------|-------|--------|----------------------|-------|----------------------|-------|----------------------|-------|----------------------|-------|----------------------|-------|----------------------|-------|
|                    |       |        | All                  |       | TSS-seq <sup>+</sup> |       | TSS-seq <sup>-</sup> |       | All                  |       | TSS-seq <sup>+</sup> |       | TSS-seq <sup>-</sup> |       |
| Proximal promoters | 4794  | 35.2%  | 4560                 | 95.1% | 4377                 | 96.0% | 183                  | 4.0%  | 234                  | 4.9%  | 138                  | 59.0% | 96                   | 41.0% |
| Other positions    | 8810  | 64.8%  | 5248                 | 59.6% | 3247                 | 61.9% | 2001                 | 38.1% | 3562                 | 40.4% | 1031                 | 28.9% | 2531                 | 71.1% |
| Intragenic         | 4272  | 31.4%  | 3198                 | 74.9% | 2302                 | 72.0% | 896                  | 28.0% | 1074                 | 25.1% | 475                  | 44.2% | 599                  | 55.8% |
| Intergenic         | 4538  | 33.4%  | 2050                 | 45.2% | 945                  | 46.1% | 1105                 | 53.9% | 2488                 | 54.8% | 556                  | 22.3% | 1932                 | 77.7% |
| Total              | 13604 | 100.0% | 9808                 | 72.1% | 7624                 | 77.7% | 2184                 | 22.3% | 3796                 | 27.9% | 1169                 | 30.8% | 2627                 | 69.2% |

Supplemental Table S3

| Genomic position  | RNA-seq <sup>+</sup> |      |        |                      |        |                      |        |
|-------------------|----------------------|------|--------|----------------------|--------|----------------------|--------|
|                   | Transcription levels | All  |        | TSS-seq <sup>+</sup> |        | TSS-seq <sup>-</sup> |        |
| Proximal Promoter | ≥5                   | 2476 | 54.3%  | 2436                 | 55.7%  | 40                   | 21.9%  |
|                   | <5                   | 2084 | 45.7%  | 1941                 | 44.3%  | 143                  | 78.1%  |
|                   | Total                | 4560 | 100.0% | 4377                 | 100.0% | 183                  | 100.0% |
| Other positions   | ≥5                   | 1049 | 20.0%  | 878                  | 27.0%  | 171                  | 8.5%   |
|                   | <5                   | 4199 | 80.0%  | 2369                 | 73.0%  | 1830                 | 91.5%  |
|                   | Total                | 5248 | 100.0% | 3247                 | 100.0% | 2001                 | 100.0% |
| Intragenic        | >5                   | 932  | 29.1%  | 793                  | 34.4%  | 139                  | 15.5%  |
|                   | <5                   | 2266 | 70.9%  | 1509                 | 65.6%  | 757                  | 84.5%  |
|                   | Total                | 3198 | 100.0% | 2302                 | 100.0% | 896                  | 100.0% |
| Intergenic        | >5                   | 117  | 5.7%   | 85                   | 9.0%   | 32                   | 2.9%   |
|                   | <5                   | 1933 | 94.3%  | 860                  | 91.0%  | 1073                 | 97.1%  |
|                   | Total                | 2050 | 100.0% | 945                  | 100.0% | 1105                 | 100.0% |
| All peaks         |                      | 9808 |        | 7624                 |        | 2184                 |        |

| Available datasets in HeLa cells |                                           | Exp. Conditions |                            | Intersections (%) |                |                |               |
|----------------------------------|-------------------------------------------|-----------------|----------------------------|-------------------|----------------|----------------|---------------|
| Studies                          | Nr of ORIs/ <i>ORI-containing regions</i> | Cell type       | Method                     | Dellino et al.    | Cadoret et al. | Karnani et al. | Mesner et al. |
| Dellino et al. (whole genome)    | 229                                       | HeLa S3         | $\alpha$ -ORC1 ChIPseq     | -                 | 29.3           | 10.9           | 46.7          |
| Cadoret et al. (ENCODE)          | 282                                       | HeLa S3         | SNS ( $\lambda$ digestion) | 23.0              | -              | 13.8           | 35.0          |
| Karnani et al. (ENCODE)          | 320                                       | HeLa            | SNS ( $\lambda$ digestion) | 7.8               | 12.8           | -              | 26.6          |
| <i>Mesner et al. (ENCODE)</i>    | 657                                       | HeLa            | Bubble trapping            | 20.2              | 14.0           | 10.7           | -             |

|                                                              | S1    | S2    | S3    | S4    | S5   | S6    | TOT   |
|--------------------------------------------------------------|-------|-------|-------|-------|------|-------|-------|
| Timing of 50 kb windows within ENCODE regions                | 123   | 222   | 85    | 52    | 71   | 90    | 643   |
| Timing of ORI Cadoret et al. (ENCODE only)                   | 95    | 117   | 34    | 16    | 14   | 6     | 282   |
| Timing of ORI-containing regions Mesner et al. (ENCODE only) | 297   | 233   | 51    | 33    | 16   | 26    | 656   |
| Timing of ORC1 peaks within ENCODE regions                   | 97    | 87    | 26    | 9     | 5    | 5     | 229   |
| ORC1 peaks common to Mesner et al.                           | 59    | 38    | 6     | 3     | 0    | 1     | 107   |
| % of ORC1 peaks common to Mesner et al.                      | 60.8% | 43.7% | 23.1% | 33.3% | 0.0% | 20.0% | 46.7% |
| ORC1 peaks common to Cadoret et al.                          | 39    | 24    | 3     | 1     | 0    | 0     | 67    |
| % of ORC1 peaks common to Cadoret et al.                     | 40.2% | 27.6% | 11.5% | 11.1% | 0.0% | 0.0%  | 29.3% |

Supplemental Table S6

## Section 2

### Supplemental Figure/Table Legends

**Figure S1. Chromatin features of known ORIs.** *Top track:* sequencing profile of DNA fragments from high-density fractions at *LMNB2* and *PRKDC* ORIs. *Lower tracks:* i) ChIP-seq profile of K79me2, K4me3 and POLR2A; ii) sequencing profile of DNA fragments from DNase I digestion (DNase hypersensitive - DH - sites); iii) RefSeq genes, as shown in the UCSC Genome Browser.

**Figure S2. Chromatin features of genomic regions enriched in high-density fractions.** Visualization of (bottom to top): RefSeq genes; ChIP-seq profiles of K79me2, K4me3 and POLR2A; DH sites and sequencing profile of DNA fragments from high-density fractions, within 100 kb from human chr. 11, as shown in the UCSC Genome Browser.

**Figure S3. Western blot showing proteins co-immunoprecipitated by the anti-ORC1 antibodies used in ChIP-seq assays.** The anti-ORC1 (and rabbit IgG) antibodies were cross-linked to Protein G sepharose beads prior to standard immunoprecipitation assays on HeLa nuclear extracts. The immunoprecipitated proteins were resolved by SDS-PAGE prior to visualization of ORC1 (positive control) and other Pre-RC subunits by immunoblotting with the indicated antibodies (the same as in Fig. 1C, plus anti-ORC6: upstate 05-938).

**Figure S4. ORC1 binding to known ORIs.** (A) QChIP data of ORC1 binding to the *PRKDC* and *LMNB2* ORIs, using unfractionated (blue) or low-density (red) chromatin. Fold enrichment of ORC1 binding as compared to the corresponding flanking regions (*LMNB2* -1 kb and *PRKDC* +5 kb) is shown. (B) ChIP-seq profile of ORC1 at the *HPRT1* and *DBF4* ORIs (Y-axis value range is as in Fig. 1F). Scale bars indicate 5 kb.

**Figure S5. Overlap between two independent anti-ORC1 ChIP-seq experiments.** (A) Venn diagram showing the overlap of the ORC1 peaks identified in the two replicates. Experiment #1 was analysed and discussed in details. (B) Boxplot representation of amplitude (height) of common and unique ORC1 peaks identified in

the two replicates.

**Figure S6. ChIP-seq profile of ORC1 peaks with small amplitude.** I, J and K ORC1 peaks (same scale as in Figures 1F and 2A) and position of ORI probes used for NSA assay (Figure 2D), as shown in the UCSC Genome Browser. Distances from ORI are in kb. Scale bar indicates 2 kb.

**Figure S7. Replication timing of regions containing validated ORIs.** Replication patterns of genomic regions containing the ORC1 peaks validated by NSA (red vertical lines): A and B ORIs (mapping within visually identified very early-replicating *inverted-V apexes*); ORI I (early); ORI J (early-middle); ORI K (late). RefSeq genes are shown.

**Figure S8. Distribution of ORC1 sites mapping within proximal promoters of RefSeq/UCSC genes** (distance from TSS is in bp).

**Figure S9. Scatter plot.** The correlation between RPKM values and the highest number of overlapping RNA tags measured at the 7,011 ORC1-sites for which RPKM values were available in the UCSC Genome Browser, is shown (see Methods).

**Figure S10. Chromatin features of POLR2A<sup>neg</sup> ORIs.** ChIP-seq profiles of ORC1, H3K4me3 and POLR2A at newly identified POLR2A<sup>neg</sup> ORIs are shown in the UCSC Genome Browser. Y-axis value ranges, where not indicated, are: 1-12 (ORC1); 1-30 (POLR2A and H3K4me3). RefSeq genes and RNA-seq data are as of March 2011.

**Figure S11. Genomic distribution of ORC1 and MCM5 sequence tags (screenshots).** Visualization of (bottom to top): ChIP-seq profiles of MCM5 and ORC1 of U937 cells (and RefSeq genes) within representative regions of human chr. 19 (350 kb-1.8 Mb wide), as shown in the UCSC Genome Browser.

**Figure S12. Genomic distribution of ORC1 and MCM5 sequence tags (heat map).** Heat map representation of the signal densities of ORC1 and MCM5 observed within 7,608 regions, half of which contained high-confidence ( $p < 0.01$  and  $h \geq 10$ )

ORC1 binding sites ( $\pm 5$  kb from the ORC1 peak summit) and half were randomly chosen around ORC1-free TSSs – containing regions ( $\pm 5$  kb from TSS; “random dataset”). The density map was subjected to clustering in order to identify groups of loci sharing similar ORC1 and MCM5 genomic profiles. The two datasets segregate in two main groups: cluster “1+2+3” (green, blue and red boxes), which contains nearly all ( $>95\%$ ) the identified ORC1 binding sites (showing identical distribution of ORC1 and MCM5 sequenced tags), and cluster “4” (orange box), containing ORC1-free TSSs, in which both ORC1 and MCM5 are virtually absent.

**Figure S13. Inter-origin spacing within inverted-V apexes showing different replication timing and amplitude of ORC1 peaks showing different replication timing or transcription levels.** Boxplot representations of: (A) inter-origin spacing measured within inverted-V apexes showing different replication timing, as indicated; (B) amplitude (height) at ORC1 peaks replicating in the S1 to S6 windows; (C) amplitude (height) of ORC1 peaks showing low ( $<1$ ), moderate (1-10) or high ( $\geq 10$ ) RNA copies/cell transcription levels.

**Figure S14. ORC1<sup>neg</sup> TSSs of active genes.** Representative ChIP-seq profiles of ORC1, POLR2A and H3K4me3 at four active TSSs without (A-C) or with (D) ORC1 binding. The RNA-seq compacted track in (B) indicates a very highly expressed gene (as viewed in the UCSC browser). The active TSS bound by ORC1 in (D) is the same as in Figure 4B. RefSeq genes and RNA-seq data are as of March 2011.

**Table S1. Numbers of DNA sequencing reads.** Numbers of total reads (raw reads) and of aligned reads prior (with duplicates) and after (without duplicates) filtering out duplicate reads (potential PCR artifacts), in two anti-ORC1 ChIP-seq experiments in HeLa cells.

**Table S2. Replication timing of ORC1 peaks and inverted-V apexes.** Columns 3-6 (inverted-V apexes): total number and percentage of *inverted-V apexes*, and number and percentage of *inverted-V apexes* containing at least one ORC1-site, for each S-phase window (S1 to S5). Columns 7-10 (ORIs): total number and percentage of ORC1 sites (ORIs, S1 to S6), and number and percentage of ORC1 sites within the *inverted-V apexes*, for each S-phase window (S1 to S5). Since S6 *inverted-V apexes*

cannot be identified, the 721 S6 ORIs were excluded from the analysis of ORIs mapping within all the *inverted-V* apexes.

**Table S3. Association of ORC1 sites with functional TSSs.** Number and percentage of ORC1 peaks mapping within or outside proximal promoters associated, or not, with RNA-seq tags and TSSs from the TSS-seq dataset (Yamashita et al. 2011).

**Table S4. Transcription levels measured at RNA-seq<sup>+</sup> ORC1-sites showing different genomic locations.** Number and percentage of RNA-seq<sup>+</sup> ORC1-peaks ( $\geq 5$  or  $< 5$  RNA copies/cell, as indicated) mapping within or outside proximal promoters and associated, or not, with TSSs from the TSS-seq dataset (Yamashita et al. 2011).

**Table S5. Overlap between available ORI datasets in HeLa cells.** Percentage of overlap (within 2.5 kb from the ORC1 and the nascent-strand peaks) between datasets of ORIs identified in different genome-wide studies of HeLa cells, using different methods. In blue: overlap between previously published datasets obtained with the same approach; in red: overlap between ORC1 peaks identified in the ENCODE regions and the previously published datasets of ORIs (Cadoret et al. 2008; Karnani et al. 2010) or ORI-containing regions (Mesner et al. 2011).

**Table S6. Replication timing of common ORIs.** Number, percentage and replication timing of the common ORIs identified in this study, in Cadoret et al. 2008 and in Mesner et al. 2011, within the ENCODE regions. Replication timing (S1-S6) in HeLa cells of the non-overlapping 50 kb windows contained within the ENCODE regions is also shown.

### Section 3

#### Supplemental Methods (Statistical analyses) and Supplemental References

1) **Significance of the association between ORC1 peaks and POLR2A, H3K4me3 or DH sites.** Datasets of RefSeq genes, DNase Hypersensitive sites, RNA Polymerase II and TSS-seq were obtained from (<http://genome.ucsc.edu/cgi-bin/hgTrackUi?hgsid=214617233&c=chr8&g=refGene>), ENCODE Univ. Washington DNaseI Hypersensitivity by Digital DNaseI at UCSC (<http://genome.ucsc.edu/cgi-bin/hgTrackUi?hgsid=214617233&c=chr8&g=wgEncodeUwDnaseSeq>), ([http://genome.ucsc.edu/cgi-bin/hgFileSearch?hgsid=222594973&db=hg18&hgt\\_tsDelRow=&hgt\\_tsAddRow=&tsName=&tsDescr=&tsGroup=Any&fsFileType=fastq&hgt\\_mdbVar1=cell&hgt\\_mdbVal1=HeLa-S3&hgt\\_mdbVar2=lab&hgt\\_mdbVal2=Yale&hgt\\_mdbVar3=antibody&hgt\\_mdbVal3=Pol2&hgfs\\_Search=search](http://genome.ucsc.edu/cgi-bin/hgFileSearch?hgsid=222594973&db=hg18&hgt_tsDelRow=&hgt_tsAddRow=&tsName=&tsDescr=&tsGroup=Any&fsFileType=fastq&hgt_mdbVar1=cell&hgt_mdbVal1=HeLa-S3&hgt_mdbVar2=lab&hgt_mdbVal2=Yale&hgt_mdbVar3=antibody&hgt_mdbVal3=Pol2&hgfs_Search=search)) and Solexa Tag Data at dbtss V7.0 of (<http://dbtss.hgc.jp>; Yamashita et al. 2011), respectively. TSS-seq Solexa tag mapping data identifying TSS clusters (TSCs) of 12 different human samples were pooled, sorted and made not redundant keeping the highest scoring record using a custom script. For all the statistical analyses testing the enrichment of specific features associated to the ORC1 sites, namely the intersection of the ORC1 peaks with POLR2A, H3K4me3 or DH sites (Table 1), we simulated 3,000 random permutations of the ORC1 sites. A one-sided Wilcoxon signed-rank test (alternative hypothesis: “greater”) was used to compare the mean of the random distribution with the actual observed value of overlapping events.

2) **Boxplots.** Statistical significance of differences among distributions shown in boxplots (two-sample test) was assessed by the non-parametric Wilcoxon signed-rank test, due to the absence of normality verified with Kolmogorov–Smirnov goodness-of-fit test. 2x75 nt raw signal file alignment of the RNA-seq experiment from HeLaS3 cells produced as part of the ENCODE Project were downloaded from UCSC site (<http://genome.ucsc.edu/cgi-bin/hgTrackUi?hgsid=213836427&c=chr5&g=wgEncodeCaltechRnaSeq>); using a

custom script, we combined the information of the original files and the intervals of the ORC1 peaks to compute, for each ORC1-site, the value corresponding to the highest number of overlapping RNAseq tags within  $\pm 2.5$  kb from the peak summit.

3) **Heat maps** were generated using seqMINER (Version 1.3; Ye et al. 2011).

4) **Evaluation of expression levels at the ORC1 sites.** The RPKM values of the Caltech experiment used in the correlation analysis were obtained from the “encodeDCC/wgEncodeCaltechRnaSeq/” repository at the UCSC site (<http://hgdownload.cse.ucsc.edu/goldenPath/hg18/encodeDCC/wgEncodeCaltechRnaSeq/>). For 7,011 ORC1 peaks we could match the number of underlying reads and the RPKM values obtained from Caltech. We performed linear regression in loglog space between RPKM and the corresponding number of overlapping reads; in order to consider also RPKM values=0,  $\log(1+x)$  was used instead of  $\log(x)$ , while loglog space was adopted to better discriminate low values. We used the regression line to interpolate the number of overlapping reads ( $n=5.53$ ) corresponding to RPKM=1 ( $R^2=0.769$ ) (Figure S6). RPKM=2 corresponds to approximately 1 RNA copy/cell (Mortazavi et al. 2008).

5) **Significance of the occurrence of ORC1 peaks within *inverted-V* apexes.** We simulated peak occurrences by randomizing their positions. Each 50 kb window of the genome was assigned an S label (S1 to S6) according to its s50 values (S1:  $0 < s50 \leq 0.167$ , etc., see main text). Each ORC1 peak was then assigned the same label as the 50 kb window containing its middle point. Each of the six groups of ORC1 peaks (S1 to S6) was randomized 1,000 times within regions with the same s50 label (i.e. S1 peaks were randomized only within S1 windows) using shuffleBed (Quinlan and Hall 2010). The 6 groups of random peaks were first merged in order to obtain 1,000 lists of random peaks with the same replication status as the 13,604 ORC1 peaks and then intersected with the 2,317 s50 *inverted-V* apexes. The Normal behavior was assessed ( $\mu=8,409.865$ ,  $\sigma=47.662$ ) and finally compared to the number of observed interactions (8,641).

6) **Significance of the occurrence of *inverted-V* apexes containing ORC1-sites.** We calculated the probability that the number of *inverted-V* apexes with  $\geq 1$  peak would be found by chance. To this end, we produced 3,000 randomizations of two groups of *inverted-V* apexes (“all the *inverted-V* apexes” and “S1-*inverted-V* apexes”) using shuffleBed utility (Quinlan and Hall 2010). In order to produce the best simulation for the “S1-*inverted-V* apexes”, we shuffled only S1- to S3-replicating 50 kb windows.

Simulation of “all the *inverted-V apexes*” was sampled using the whole genome. We assessed significance of the enrichment by comparing distributions of simulated results with the observed number of *inverted-V apexes* containing at least one ORC1-site and applying a Wilcoxon signed-rank test using R (R Development Core Team (2011). R: A language and environment for statistical computing. R Foundation for Statistical Computing, Vienna, Austria. ISBN 3-900051-07-0, URL <http://www.R-project.org/>).

### Supplemental References

- Mortazavi A, Williams BA, McCue K, Schaeffer L, Wold B. 2008. Mapping and quantifying mammalian transcriptomes by RNA-Seq. *Nature Methods* 5: 621-628.
- Quinlan AR, Hall IM. 2010. BEDTools: a flexible suite of utilities for comparing genomic features. *Bioinformatics* 26(6): 841-842.
- Yamashita R, Sathira NP, Kanai A, Tanimoto K, Arauchi T, Tanaka Y, Hashimoto S, Sugano S, Nakai K, Suzuki Y. 2011. Genome-wide characterization of transcriptional start sites in humans by integrative transcriptome analysis. *Genome research* 21(5): 775-789.
- Ye T, Krebs AR, Choukrallah MA, Keime C, Plewniak F, Davidson I, Tora L. 2011. seqMINER: an integrated ChIP-seq data interpretation platform. *Nucleic acids research* 39(6): e35.
